# Supplementary material
Source: MDPI journal article supplement (https://www.mdpi.com/1999-4907/13/11/1960)
Supplement: s1 [file s1 › Supplementary Materials.pdf]

# Forests and forestry in support of Sustainable Development Goals (SDGs): A bibliometric analysis

Zhiyuan Ma <sup>1</sup> • Chen Hu <sup>1</sup> • Jinlian Huang <sup>1</sup> • Tian Li <sup>1</sup> • Jingpin Lei <sup>1,2\*</sup>

*1.Key Laboratory of Forest Silviculture of the State Forestry and Grassland Administration, Research Institute of Forestry, Chinese Academy of Forestry, Beijing 100091, China*

*2.Co-Innovation Center for Sustainable Forestry in Southern China, Nanjing Forestry University, Nanjing 210037, Jiangsu, China*

Co-authors Email: mazhiyuan19940831@163.com (MA); hubrick@foxmail.com(HU); 2550532842@qq.com (HUANG); litian13691129102@163.com(LI)

**Supplementary Table S1. Sustainable development goals (SDGs) and the targets that are relevant to forestry.**

| Goal                                                                              | Targets relevant to forestry                                                                                                                                                                                                     | Explanations                                                                                                                                                                                                                                                                              | References                                                               |
|-----------------------------------------------------------------------------------|----------------------------------------------------------------------------------------------------------------------------------------------------------------------------------------------------------------------------------|-------------------------------------------------------------------------------------------------------------------------------------------------------------------------------------------------------------------------------------------------------------------------------------------|--------------------------------------------------------------------------|
| <b>SDG 1</b><br><b>No poverty</b><br>-<br>End poverty in all its forms everywhere | 1.1 By 2030, eradicate extreme poverty for all people everywhere, currently measured as people living on less than \$1.25 a day                                                                                                  | Forests can increase the income of surrounding residents through eco-tourism, forest products, etc., and forest provides the necessities of life for the surrounding residents, so there is no need to buy these items (wood only energy, medicine, etc.), thereby supporting target 1.1. | Gavin M C et al., 2009<br>Yemiru T et al., 2010<br>Wang R J et al., 2022 |
|                                                                                   | 1.5 By 2030, build the resilience of the poor and those in vulnerable situations and reduce their exposure and vulnerability to climate-related extreme events and other economic, social and environmental shocks and disasters | Forest ecosystems are more diverse and more stable than single agricultural systems. Forest products are less affected by natural disasters than crops, thereby increasing the resilience of the poor to disasters, supporting target 1.5.                                                | Duffy et al., 2021<br>Wunder S et al., 2014<br>Fisher, M et al., 2010    |
| <b>SDG 2</b><br><b>Zero hunger</b>                                                | 2.1 By 2030, end hunger and ensure access by all people, in particular the                                                                                                                                                       | 1. Direct effects : Forest can provide food including woody food, meat, fruit, etc.                                                                                                                                                                                                       | Khatri D et al., 2017<br>Asprilla P J et al., 2019                       |

|                                                                                                                                                 |                                                                                                                                                                                                                                                                                                                                                                                      |                                                                                                                                                                                                                                                                                                                                |                                                                           |
|-------------------------------------------------------------------------------------------------------------------------------------------------|--------------------------------------------------------------------------------------------------------------------------------------------------------------------------------------------------------------------------------------------------------------------------------------------------------------------------------------------------------------------------------------|--------------------------------------------------------------------------------------------------------------------------------------------------------------------------------------------------------------------------------------------------------------------------------------------------------------------------------|---------------------------------------------------------------------------|
| <p>-</p> <p>End hunger, achieve food security and improved nutrition and promote sustainable agriculture.</p>                                   | <p>poor and people in vulnerable situations, including infants, to safe, nutritious and sufficient food all year round</p>                                                                                                                                                                                                                                                           | <p>2. Indirect effects: Forests enhance the productive potential of agriculture and fisheries through soil and water conservation, nutrient cycling, soil formation, biodiversity conservation, etc. Forestry contributes to food security by providing income for the people. Therefore, forestry can support target 2.1.</p> |                                                                           |
|                                                                                                                                                 | <p>2.3 By 2030, double the agricultural productivity and incomes of small-scale food producers, in particular women, indigenous peoples, family farmers, pastoralists and fishers, including through secure and equal access to land, other productive resources and inputs, knowledge, financial services, markets and opportunities for value addition and non-farm employment</p> | <p>The forestry sector provides people with non-farm employment and increases their income which supports target 2.3.</p>                                                                                                                                                                                                      | <p>Lippe R S et al., 2021<br/>Li Y S et al., 2019</p>                     |
| <p><b>SDG 3</b></p> <p><b>Good health &amp; Well-being</b></p> <p>-</p> <p>Ensure healthy lives and promote well-being for all at all ages.</p> | <p>3.9 By 2030, substantially reduce the number of deaths and illnesses from hazardous chemicals and air, water and soil pollution and contamination</p>                                                                                                                                                                                                                             | <p>Forest plants remove air pollution by intercepting particulate matter on the surface of the plant and absorbing gaseous pollutants through the leaves of the leaves. Forest soil reduces water and soil pollution by adsorption and retention functions. Forest purification water, air, soil support target 3.9.</p>       | <p>Nowak D J et al., 2014;<br/>Brown K R et al., 2013</p>                 |
| <p><b>SDG 5</b></p> <p><b>Gender equality</b></p> <p>-</p> <p>Achieve gender equality and</p>                                                   | <p>5.5 Ensure women's full and effective participation and equal opportunities for leadership at all levels of decisionmaking in</p>                                                                                                                                                                                                                                                 | <p>Forestry employs women, adding opportunities for women to participate in management and decision -making which supports target 5.5.</p>                                                                                                                                                                                     | <p>Atmiş E et al., 2007<br/>Das N et al., 2011<br/>Coleman E A., 2013</p> |

|                                                                                                                                                                                        |                                                                                                                                     |                                                                                                                                                                                                 |                                                  |
|----------------------------------------------------------------------------------------------------------------------------------------------------------------------------------------|-------------------------------------------------------------------------------------------------------------------------------------|-------------------------------------------------------------------------------------------------------------------------------------------------------------------------------------------------|--------------------------------------------------|
| empower all women and girls                                                                                                                                                            | political, economic and public life                                                                                                 |                                                                                                                                                                                                 |                                                  |
| <b>SDG 6</b><br><b>Clean Water and Sanitation</b><br>-<br>Ensure availability and sustainable management of water and sanitation for all                                               | 6.6 By 2020, protect and restore water-related ecosystems, including mountains, forests, wetlands, rivers, aquifers and lakes       | Forests and trees have functions such as regulating runoffs and supporting groundwater supply. It is an important source of water source which support target 6.6.                              | Zhang B et al., 2010<br>Gonzales P et al., 2017  |
| <b>SDG 7</b><br><b>Affordable and clean energy</b><br>-<br>Ensure access to affordable, reliable, sustainable and modern energy for all.                                               | 7.1 By 2030, ensure universal access to affordable, reliable and modern energy services                                             | Forests can provide biofuels and can be used as the energy of the public to warm, cook, and industrial manufacture, thereby supporting target 7.1.                                              | Jacobson M et al.,2020                           |
|                                                                                                                                                                                        | 7.2 By 2030, increase substantially the share of renewable energy in the global energy mix                                          | Forest-based biofuels have the characteristics of renewable and sustainable and are an important renewable energy source that supports target 7.2.                                              | Jåstad E O et al., 2019<br>Deng Y Y et al., 2015 |
| <b>SDG 8</b><br><b>Decent work &amp; Economic growth</b><br>-<br>Promote sustained, inclusive and sustainable economic growth, full and productive employment and decent work for all. | 8.9 By 2030, devise and implement policies to promote sustainable tourism that creates jobs and promotes local culture and products | The forest ecosystem can provide recreational venues and cultural services. It is an important sustainable tourist place and can support target 8.9.                                            | Tampakis S et al, 2019                           |
| <b>SDG 11</b><br><b>Sustainable cities and communities</b><br>-<br>Make cities and                                                                                                     | 11.4 Strengthen efforts to protect and safeguard the world's cultural and natural heritage                                          | Forests are included in some areas as part of the World Heritage Site or adjacent areas. Forests can enhance a sense of community belonging, enhance the beauty of the surrounding environment, | Piras F et al, 2021<br>Parrotta, J A et al, 2007 |

|                                                                                                                                                                                       |                                                                                                                                                                                                                                                             |                                                                                                                                                                                                               |                                                              |
|---------------------------------------------------------------------------------------------------------------------------------------------------------------------------------------|-------------------------------------------------------------------------------------------------------------------------------------------------------------------------------------------------------------------------------------------------------------|---------------------------------------------------------------------------------------------------------------------------------------------------------------------------------------------------------------|--------------------------------------------------------------|
| human settlements inclusive, safe, resilient and sustainable.                                                                                                                         |                                                                                                                                                                                                                                                             | stimulate artistic expression and promote local tourism, etc. Sustainable forest management can contribute to the protection of local cultural and natural heritage, thereby contributing to target 11.4.     |                                                              |
|                                                                                                                                                                                       | 11.7 By 2030, provide universal access to safe, inclusive and accessible, green and public spaces, in particular for women and children, older persons and persons with disabilities                                                                        | Forests as green and public spaces for recreation can contribute to the achievement of target 11.7.                                                                                                           | Konijnendijk C C et al., 2006<br>Nitoslawski SA et al., 2019 |
| <b>SDG 12</b><br><b>Responsible consumption and production</b><br>-<br>Ensure sustainable consumption and production patterns.                                                        | 12.2 By 2030, achieve the sustainable management and efficient use of natural resources                                                                                                                                                                     | Sustainable forest management and responsible consumption of forest products can support target 12.2.                                                                                                         | Panico et al., 2022                                          |
| <b>SDG 13</b><br><b>Climate action</b><br>-<br>Take urgent action to combat climate change and its impacts.                                                                           | 13.1 Strengthen resilience and adaptive capacity to climate-related hazards and natural disasters in all countries                                                                                                                                          | Forest plants perform photosynthesis, absorb carbon dioxide from the atmosphere, reduce the concentration of greenhouse gases in the atmosphere, and mitigate climate change, thereby supporting target 13.1. | Favero A et al., 2018<br>Kindermann G et al., 2008           |
| <b>SDG 15</b><br><b>Life on land</b><br>-<br>Protect, restore and promote sustainable use of terrestrial ecosystems, sustainably manage forests, combat desertification, and halt and | 15.1 By 2020, ensure the conservation, restoration and sustainable use of terrestrial and inland freshwater ecosystems and their services, in particular forests, wetlands, mountains and drylands, in line with obligations under international agreements | This target clarifies the protection and restoration of forests, which is also the purpose of forestry.                                                                                                       |                                                              |
|                                                                                                                                                                                       | 15.2 By 2020, promote the implementation of sustainable management of                                                                                                                                                                                       | This target clarifies sustainable forest management, stopping deforestation, restoring degraded                                                                                                               |                                                              |

|                                                      |                                                                                                                                                                                                   |                                                                                                                                                                                    |                                                                                             |
|------------------------------------------------------|---------------------------------------------------------------------------------------------------------------------------------------------------------------------------------------------------|------------------------------------------------------------------------------------------------------------------------------------------------------------------------------------|---------------------------------------------------------------------------------------------|
| reverse land degradation and halt biodiversity loss. | all types of forests, halt deforestation, restore degraded forests and substantially increase afforestation and reforestation globally                                                            | forests, and afforestation which is the purpose of forestry.                                                                                                                       |                                                                                             |
|                                                      | 15.3 By 2030, combat desertification, restore degraded land and soil, including land affected by desertification, drought and floods, and strive to achieve a land degradation neutral world      | Deforestation is one of the causes of land degradation. Protecting and restoring forest ecosystems is an effective way to prevent soil degradation which supports target 15.3.     | Kouassi J L et al., 2021<br>Grinand C et al., 2020<br>Chazdon R L et al., 2008              |
|                                                      | 15.4 By 2030, ensure the conservation of mountain ecosystems, including their biodiversity, in order to enhance their capacity to provide benefits that are essential for sustainable development | Forests in mountain ecosystems provide diverse services and goods to mountain landscapes, and the protection and restoration of mountain forests which supports target 15.2.       | Sears R R et al., 2018                                                                      |
|                                                      | 15.5 Take urgent and significant action to reduce the degradation of natural habitats, halt the loss of biodiversity and, by 2020, protect and prevent the extinction of threatened species       | Forests are vital habitats for terrestrial biota and support more than half of the terrestrial animal and plant species. Protecting and restoring forests can support target 15.5. | Millenium Ecosystem Assessment 2005<br>Klenner W et al., 2009<br>Brockhoff E G et al., 2008 |

**Table S2. Keywords of Sustainable development goals (SDGs) and targets (Wang et al., 2022). The keywords of the targets are indicated in bold.**

| Goals and targets | Keywords                                                                                                                                                                                                                                          |
|-------------------|---------------------------------------------------------------------------------------------------------------------------------------------------------------------------------------------------------------------------------------------------|
| 1.1               | By 2030, <b>eradicate extreme poverty</b> for all people everywhere, currently measured as people living on less than \$1.25 a day                                                                                                                |
| 1.5               | By 2030, <b>build the resilience</b> of the poor and those <b>in vulnerable situations</b> and <b>reduce their exposure and vulnerability to climate-related extreme events and other economic, social and environmental shocks and disasters</b> |
| 2.1               | By 2030, <b>end hunger</b> and ensure access by all people, in particular the poor and people in vulnerable situations, including infants, to <b>safe, nutritious and sufficient food</b> all year round                                          |

|      |                                                                                                                                                                                                                                                                                                                                                                                   |
|------|-----------------------------------------------------------------------------------------------------------------------------------------------------------------------------------------------------------------------------------------------------------------------------------------------------------------------------------------------------------------------------------|
| 2.3  | By 2030, <b>double the agricultural productivity and incomes of small-scale food producers</b> , in particular women, indigenous peoples, family farmers, pastoralists and fishers, including through secure and equal access to land, other productive resources and inputs, knowledge, financial services, markets and opportunities for value addition and non-farm employment |
| 3.5  | <b>Strengthen the prevention and treatment of substance abuse</b> , including narcotic drug abuse and harmful use of alcohol                                                                                                                                                                                                                                                      |
| 5.5  | <b>Ensure women's full and effective participation and equal opportunities for leadership</b> at all levels of decisionmaking in political, economic and public life                                                                                                                                                                                                              |
| 6.6  | By 2020, <b>protect and restore water-related ecosystems</b> , including mountains, forests, wetlands, rivers, aquifers and lakes                                                                                                                                                                                                                                                 |
| 7.1  | By 2030, <b>ensure universal access</b> to affordable, reliable and modern <b>energy services</b>                                                                                                                                                                                                                                                                                 |
| 7.2  | By 2030, <b>increase</b> substantially the <b>share of renewable energy</b> in the global energy mix                                                                                                                                                                                                                                                                              |
| 8.9  | By 2030, devise and <b>implement policies to promote sustainable tourism</b> that creates jobs and promotes local culture and products                                                                                                                                                                                                                                            |
| 11.4 | Strengthen efforts to <b>protect and safeguard the world's cultural and natural heritage</b>                                                                                                                                                                                                                                                                                      |
| 11.7 | By 2030, <b>provide universal access to safe, inclusive and accessible, green and public spaces</b> , in particular for women and children, older persons and persons with disabilities                                                                                                                                                                                           |
| 12.2 | By 2030, <b>achieve the sustainable management and efficient use of natural resources</b>                                                                                                                                                                                                                                                                                         |
| 13.1 | <b>Strengthen resilience and adaptive capacity to climate-related hazards and natural disasters</b> in all countries                                                                                                                                                                                                                                                              |
| 15.1 | By 2020, <b>ensure the conservation, restoration and sustainable use of terrestrial and inland freshwater ecosystems and their services</b> , in particular forests, wetlands, mountains and drylands, in line with obligations under international agreements                                                                                                                    |
| 15.2 | By 2020, <b>promote</b> the implementation of <b>sustainable management of all types of forests, halt deforestation, restore degraded forests</b> and substantially <b>increase afforestation and reforestation</b> globally                                                                                                                                                      |
| 15.3 | By 2030, <b>combat desertification, restore degraded land and soil</b> , including land affected by desertification, drought and floods, and strive to achieve a land degradation neutral world                                                                                                                                                                                   |
| 15.4 | By 2030, <b>ensure the conservation of mountain ecosystems</b> , including their biodiversity, in order to enhance their capacity to provide benefits that are essential for sustainable development                                                                                                                                                                              |
| 15.5 | Take urgent and significant action to <b>reduce the degradation of natural habitats, halt the loss of biodiversity</b> and, by 2020, protect and <b>prevent the extinction of threatened species</b>                                                                                                                                                                              |

**Table S3. The seven-point-scale framework of Griggs et al (Griggs; 2015 et al) to analyze the relationship between SDGs. The ‘Seven-Point Scale’ framework from Griggs et al. (2017) who classified the interactions at 7 levels: (+3) indivisible, (+2) reinforcing, (+1) enabling, (0) consistent, (-1) constraining, (-2) counteracting, (-3) canceling. Definitions of the seven levels are from Griggs et al.**

| Interactions | Synergies                                                                                                                |                                                                                                |                                                                              | Neutral                                                                                                                                                         | Trade-offs                                                                                                                              |                                                               |                                                                                                                                                                                                             |
|--------------|--------------------------------------------------------------------------------------------------------------------------|------------------------------------------------------------------------------------------------|------------------------------------------------------------------------------|-----------------------------------------------------------------------------------------------------------------------------------------------------------------|-----------------------------------------------------------------------------------------------------------------------------------------|---------------------------------------------------------------|-------------------------------------------------------------------------------------------------------------------------------------------------------------------------------------------------------------|
| Scoring      | +3                                                                                                                       | +2                                                                                             | +1                                                                           | 0                                                                                                                                                               | -1                                                                                                                                      | -2                                                            | -3                                                                                                                                                                                                          |
| Definition*  | The strongest form of positive interaction in which one objective is inextricably linked to the achievement of another.” | “One objective directly creates conditions that lead to the achievement of another objective.” | “The pursuit of one objective enables the achievement of another objective.” | “A neutral relationship where one objective does not significantly interact with another or where interactions are deemed to be neither positive nor negative.” | “A mild form of negative interaction when the pursuit of one objective sets a condition or a constraint on the achievement of another.” | “The pursuit of one objective counteracts another objective.” | “The most negative interaction is where progress in one goal makes it impossible to reach another goal and possibly leads to a deteriorating state of the second. A choice has to be made between the two.” |

**Table S4 Interactions between SDG15 and other SDGs at target level. The interactions were assessed based on the ‘Seven-Point Scale’ framework from Griggs et al. (2017) who classified the interactions at 7 levels: (+3) indivisible, (+2) reinforcing, (+1) enabling, (0) consistent, (-1) constraining, (-2) counteracting, (-3) canceling. The definitions of the 7 levels of interactions are given in Supplementary Table 2 .**

|       |         | SDG 15 Life on Land                                                                                                                                               |                                                                                                                                                            |                                                                                                                                           |                                                                                                                                                                                       |                                                                                                                                                                                             |
|-------|---------|-------------------------------------------------------------------------------------------------------------------------------------------------------------------|------------------------------------------------------------------------------------------------------------------------------------------------------------|-------------------------------------------------------------------------------------------------------------------------------------------|---------------------------------------------------------------------------------------------------------------------------------------------------------------------------------------|---------------------------------------------------------------------------------------------------------------------------------------------------------------------------------------------|
| Goals | Targets | 15.1 By 2020, ensure the conservation, restoration and sustainable use of terrestrial and inland freshwater ecosystems and their services, in particular forests, | 15.2 By 2020, promote the implementation of sustainable management of all types of forests, halt deforestation, restore degraded forests and substantially | 15.3 By 2030, combat desertification, restore degraded land and soil, including land affected by desertification, drought and floods, and | 15.4 By 2030, ensure the conservation of mountain ecosystems, including their biodiversity, in order to enhance their capacity to provide benefits that are essential for sustainable | 15.5 Take urgent and significant action to reduce the degradation of natural habitats, halt the loss of biodiversity and, by 2020, protect and prevent the extinction of threatened species |

|                      |                                                                                                                                                                                                                                  |                                                                                                                                                                                                                                          |                                                   |                                                    |                                                                                                                                                                                                                                                                |                                                                                                                                                                                                                                               |
|----------------------|----------------------------------------------------------------------------------------------------------------------------------------------------------------------------------------------------------------------------------|------------------------------------------------------------------------------------------------------------------------------------------------------------------------------------------------------------------------------------------|---------------------------------------------------|----------------------------------------------------|----------------------------------------------------------------------------------------------------------------------------------------------------------------------------------------------------------------------------------------------------------------|-----------------------------------------------------------------------------------------------------------------------------------------------------------------------------------------------------------------------------------------------|
|                      |                                                                                                                                                                                                                                  | wetlands, mountains and drylands, in line with obligations under international agreements                                                                                                                                                | increase afforestation and reforestation globally | strive to achieve a land degradation neutral world | development                                                                                                                                                                                                                                                    |                                                                                                                                                                                                                                               |
| SDG 1<br>No Poverty  | 1.1 By 2030, eradicate extreme poverty for all people everywhere, currently measured as people living on less than \$1.25 a day                                                                                                  | 15.1 to 1.1: -2;<br>Forest ecosystem conservation could hinder target 2.1, by reducing the income of the surrounding resident.<br><br>1.1 to 15.1: +1;<br>Eradicate extreme poverty could reduce environment stress of forest ecosystem. |                                                   |                                                    | 15.4 to 1.1: -2<br>Mountain ecosystem conservation could hinder target 2.1, by reducing the income of the surrounding resident.<br><br>1.1 to 15.4: +1<br>Forest ecosystem<br>Eradicate extreme poverty could reduce environment stress of mountain ecosystem. | 15.3 to 1.1: -2<br>Natural habitats could hinder target 2.1, by reducing the income of the surrounding resident.<br><br>1.1 to 15.5: +1<br>Forest ecosystem<br>Eradicate extreme poverty could reduce environment stress of natural habitats. |
|                      | 1.5 By 2030, build the resilience of the poor and those in vulnerable situations and reduce their exposure and vulnerability to climate-related extreme events and other economic, social and environmental shocks and disasters |                                                                                                                                                                                                                                          |                                                   |                                                    |                                                                                                                                                                                                                                                                |                                                                                                                                                                                                                                               |
| SDG 2<br>Zero Hunger | 2.1 By 2030, end hunger and ensure access                                                                                                                                                                                        | 15.1 to 2.1: -2<br>Forest ecosystem conservation could                                                                                                                                                                                   |                                                   |                                                    | 15.3 to 2.1: -2<br>Mountain ecosystem conservation                                                                                                                                                                                                             | 15.4to 2.1: -2<br>Natural habitats could hinder target                                                                                                                                                                                        |

|              |                                                                                                                                                                                                                                                                                                                                                                               |                                                                                                                                                         |                                                                   |                               |                                                                                                                                                                  |                                                                                                                                             |
|--------------|-------------------------------------------------------------------------------------------------------------------------------------------------------------------------------------------------------------------------------------------------------------------------------------------------------------------------------------------------------------------------------|---------------------------------------------------------------------------------------------------------------------------------------------------------|-------------------------------------------------------------------|-------------------------------|------------------------------------------------------------------------------------------------------------------------------------------------------------------|---------------------------------------------------------------------------------------------------------------------------------------------|
|              | by all people, in particular the poor and people in vulnerable situations, including infants, to safe, nutritious and sufficient food all year round                                                                                                                                                                                                                          | hinder target 2.1, by reducing the income of the surrounding resident.<br>2.1 to 15.1: +1<br>End hunger reduce environmental stress of forest ecosystem |                                                                   |                               | could hinder target 2.1, by reducing the income of the surrounding resident.<br>2.1 to 15.4: +1<br>End hunger reduce environmental stress of mountain ecosystem. | 2.1, by reducing the income of the surrounding resident.<br>2.1 to 15.5 : +1<br>End hunger reduce environmental stress of natural habitats. |
|              | 2.3 By 2030, double the agricultural productivity and incomes of small-scale food producers, in particular women, indigenous peoples, family farmers, pastoralists and fishers, including through secure and equal access to land, other productive resources and inputs, knowledge, financial services, markets and opportunities for value addition and non-farm employment |                                                                                                                                                         | 15.2 to 2.3 : +2<br>Afforestation provides employment opportunity |                               |                                                                                                                                                                  |                                                                                                                                             |
| <b>SDG 3</b> | 3.9 By 2030, substantially                                                                                                                                                                                                                                                                                                                                                    | 15.1 to 3.9: +1<br>Forest ecosystem                                                                                                                     | 15.2 to 3.9 : +1<br>Afforestation and                             | 15.2 to 3.9 : +1<br>Combating | 15.2 to 3.9 : +1<br>Mountain ecosystem                                                                                                                           |                                                                                                                                             |

|                                          |                                                                                                                                                                   |                                                                                                                                                                |                                                                                |                                                                                                                        |                                                                                                                                                                                         |                                                                                                                                                              |
|------------------------------------------|-------------------------------------------------------------------------------------------------------------------------------------------------------------------|----------------------------------------------------------------------------------------------------------------------------------------------------------------|--------------------------------------------------------------------------------|------------------------------------------------------------------------------------------------------------------------|-----------------------------------------------------------------------------------------------------------------------------------------------------------------------------------------|--------------------------------------------------------------------------------------------------------------------------------------------------------------|
|                                          | reduce the number of deaths and illnesses from hazardous chemicals and air, water and soil pollution and contamination                                            | conservation could improve environmental quality to contribute to target 3.9.                                                                                  | reforestation could improve environmental quality to contribute to target 3.9. | desertification, and restoring degraded land and soil could improve environmental quality to contribute to target 3.9. | conservation could improve environmental quality to contribute to target 3.9.                                                                                                           |                                                                                                                                                              |
| <b>SDG 5 Gender Equality</b>             | 5.5 Ensure women's full and effective participation and equal opportunities for leadership at all levels of decisionmaking in political, economic and public life |                                                                                                                                                                |                                                                                |                                                                                                                        |                                                                                                                                                                                         |                                                                                                                                                              |
| <b>SDG 6</b>                             | 6.6 By 2020, protect and restore water-related ecosystems, including mountains, forests, wetlands, rivers, aquifers and lakes                                     | 15.1 to 6.6: +2<br>Forest ecosystem conservation could promotion target 6.6.<br><br>6.6 to 15.1: +2<br>Vice versa                                              |                                                                                |                                                                                                                        | 15.4 to 6.6:+2<br>Mountain ecosystem conservation could promotion target 6.6.<br><br>6.6 to 15.1: +2<br>Vice versa                                                                      | 15.5 to 6.6:+2<br>Natural habitats protection could promotion target 6.6.<br><br>6.6 to 15.1: +2<br>Vice versa                                               |
| <b>SDG 7 Affordable and Clean Energy</b> | 7.1 By 2030, ensure universal access to affordable, reliable and modern energy services                                                                           | 15.1 to 7.1 :-3<br>Forest ecosystem conservation could offset ensuring universal access to affordable, reliable, and modern energy services.<br>7.1 to 15.1:+2 |                                                                                |                                                                                                                        | 15.4 to 7.4: -3<br>Mountain ecosystem conservation could offset ensuring universal access to affordable, reliable, and modern energy services.<br>7.1 to 15.4: +2<br>Ensuring universal | 15.5to 7.4: -3<br>Natural habitats protection could offset ensuring universal access to affordable, reliable, and modern energy services.<br>7.1 to 15.5: +2 |

|                                                              |                                                                                                                                     |                                                                                                                                                                                                       |  |  |                                                                                                                                                                                                          |                                                                                                                                                                                                     |
|--------------------------------------------------------------|-------------------------------------------------------------------------------------------------------------------------------------|-------------------------------------------------------------------------------------------------------------------------------------------------------------------------------------------------------|--|--|----------------------------------------------------------------------------------------------------------------------------------------------------------------------------------------------------------|-----------------------------------------------------------------------------------------------------------------------------------------------------------------------------------------------------|
|                                                              |                                                                                                                                     | Ensuring universal access to affordable, reliable, and modern energy services could contribute to forest ecosystem conservation by reducing logging.                                                  |  |  | access to affordable, reliable, and modern energy services could contribute to mountain ecosystem conservation by reducing logging.                                                                      | Ensuring universal access to affordable, reliable, and modern energy services could contribute to natural habitats conservation by reducing logging.                                                |
|                                                              | 7.2 By 2030, increase substantially the share of renewable energy in the global energy mix                                          | 7.2 to 5.1 : -1<br>Increasing substantially the share of renewable energy in the global energy mix could lead to environmental stress on forest ecosystems by increasing access to natural resources. |  |  | 7.2 to 5.4: : -1<br>Increasing substantially the share of renewable energy in the global energy mix could lead to environmental stress on mountain ecosystems by increasing access to natural resources. | 7.2 to 5.5: -1<br>Increasing substantially the share of renewable energy in the global energy mix could lead to environmental stress on natural habitats by increasing access to natural resources. |
| <b>SDG 8<br/>Decent Work<br/>and<br/>Economic<br/>Growth</b> | 8.9 By 2030, devise and implement policies to promote sustainable tourism that creates jobs and promotes local culture and products |                                                                                                                                                                                                       |  |  |                                                                                                                                                                                                          |                                                                                                                                                                                                     |
| <b>SDG 11<br/>Sustainable<br/>Cities and<br/>Communities</b> | 11.4 Strengthen efforts to protect and safeguard the world's cultural and natural heritage                                          | 15.1 to 11.4: +2<br>Protecting and safeguarding the world's cultural and natural heritage conducive to forest ecosystem protection.<br>11.4 to 15.1: +2                                               |  |  | 15.4 to 11.4: +2<br>Protecting and safeguarding the world's cultural and natural heritage conducive to mountain ecosystems protection.<br>11.4 to 15.4: +2                                               | 15.5 to 11.4: +2<br>Protecting and safeguarding the world's cultural and natural heritage conducive to natural habitats protection.                                                                 |

|                                                          |                                                                                                                                                                                      |                                                                                                                                                                           |                                                                                                                                                          |  |                                                                                                                                                           |                                                                                                                                                           |
|----------------------------------------------------------|--------------------------------------------------------------------------------------------------------------------------------------------------------------------------------------|---------------------------------------------------------------------------------------------------------------------------------------------------------------------------|----------------------------------------------------------------------------------------------------------------------------------------------------------|--|-----------------------------------------------------------------------------------------------------------------------------------------------------------|-----------------------------------------------------------------------------------------------------------------------------------------------------------|
|                                                          |                                                                                                                                                                                      | Vice versa                                                                                                                                                                |                                                                                                                                                          |  | Vice versa                                                                                                                                                | 11.4 to 15.5: +2<br>Vice versa                                                                                                                            |
|                                                          | 11.7 By 2030, provide universal access to safe, inclusive and accessible, green and public spaces, in particular for women and children, older persons and persons with disabilities | 15.1 to 11.7: +2<br>Protecting the forest ecosystem around the residential area can promote universal access to safe, inclusive, and accessible, green and public spaces. | 15.2 to 11.7: +2<br>Afforestation around the residential area can promote universal access to safe, inclusive, and accessible, green and public spaces.  |  |                                                                                                                                                           |                                                                                                                                                           |
| <b>SDG 12<br/>Responsible Consumption and Production</b> | 12.2 By 2030, achieve the sustainable management and efficient use of natural resources                                                                                              | 12.2 to 15.1: +2<br>Sustainable management and efficient use of natural resources could promote the protection of forest ecosystems.                                      |                                                                                                                                                          |  | 12.2 to 15.1: +2<br>Sustainable management and efficient use of natural resources could promote the protection of mountain ecosystems.                    | 12.2 to 15.1: +2<br>Sustainable management and efficient use of natural resources could promote the protection of habitats protection.                    |
| <b>SDG 13<br/>Climate Action</b>                         | 13.1 Strengthen resilience and adaptive capacity to climate-related hazards and natural disasters in all countries                                                                   | 15.1 to 13.1: +2<br>Forest ecosystem protection can be strengthened resilience and adaptive capacity to climate-related hazards and natural disasters.                    | 15.2 to 13.1: +2<br>Sustainable forest management can be strengthened resilience and adaptive capacity to climate-related hazards and natural disasters. |  | 15.4 to 13.1: +2<br>Mountain ecosystems.protection can be strengthened resilience and adaptive capacity to climate-related hazards and natural disasters. | 15.5 to 13.1: +2<br>Habitats protection protection can be strengthened resilience and adaptive capacity to climate-related hazards and natural disasters. |

**Table S5 Top 10 corresponding authors' nationalities on SDGs studies related to forests and forestry**

| <b>Country</b> | <b>Articles</b> | <b>SCP</b> | <b>MCP</b> | <b>MCP Ratio</b> |
|----------------|-----------------|------------|------------|------------------|
| USA            | 49              | 22         | 27         | 0.551            |
| China          | 44              | 20         | 24         | 0.545            |
| UK             | 38              | 14         | 24         | 0.632            |

|             |    |   |    |       |
|-------------|----|---|----|-------|
| Australia   | 22 | 5 | 17 | 0.773 |
| Germany     | 22 | 8 | 14 | 0.636 |
| Austria     | 13 | 3 | 10 | 0.769 |
| Italy       | 13 | 7 | 6  | 0.462 |
| Netherlands | 13 | 6 | 7  | 0.538 |
| Switzerland | 12 | 3 | 9  | 0.750 |
| Sweden      | 9  | 5 | 4  | 0.444 |

Note: Single-country publication (SCP); multiple-country publication (MCP).

**Table S6 Top 10 Frequency of national cooperation**

| <i>From</i> | <i>To</i>   | <i>Frequency</i> |
|-------------|-------------|------------------|
| USA         | UK          | 28               |
| USA         | Australia   | 22               |
| USA         | Canada      | 17               |
| UK          | Netherlands | 16               |
| USA         | China       | 16               |
| USA         | Netherlands | 16               |
| USA         | Germany     | 15               |
| Germany     | Australia   | 14               |
| UK          | France      | 14               |
| UK          | Germany     | 14               |

**Table S7 High-frequency keywords (Top 30)**

| Keywords                             | Frequencies | Keywords                         | Frequenc |
|--------------------------------------|-------------|----------------------------------|----------|
| sustainable development goals        | 93          | protected areas                  | 9        |
| ecosystem services                   | 40          | land use                         | 9        |
| sustainability                       | 29          | conservation                     | 9        |
| climate change                       | 29          | un sustainable development goals | 8        |
| sdgs                                 | 24          | governance                       | 8        |
| sustainable development              | 23          | soil organic carbon              | 7        |
| biodiversity                         | 19          | paris agreement                  | 7        |
| remote sensing                       | 16          | food security                    | 7        |
| deforestation                        | 14          | bioeconomy                       | 7        |
| sustainable development goals (sdgs) | 13          | sustainable land management      | 6        |
| land degradation                     | 13          | resilience                       | 6        |
| redd+                                | 10          | policy                           | 6        |
| indicators                           | 10          | monitoring                       | 6        |
| agenda 2030                          | 10          | social-ecological                | 5        |

|                               |   |                |   |
|-------------------------------|---|----------------|---|
| sustainable forest management | 9 | systems<br>sdg | 5 |
|-------------------------------|---|----------------|---|

Note: sustainable development goals, sdgs, sustainable development, sustainable development goals (sdgs), sdg are the subject words.

**Table S8 Reference clustering**

| Cluster ID | Size | Silhouette | Cluster label (LLR) |
|------------|------|------------|---------------------|
| 0          | 46   | 0.831      | human well-being    |
| 1          | 42   | 0.842      | food security       |
| 2          | 42   | 0.922      | land use            |
| 3          | 31   | 0.858      | land productivity   |
| 4          | 25   | 0.860      | land tenure         |
| 5          | 24   | 0.895      | tree loss           |
| 6          | 18   | 0.986      | simulation models   |
| 7          | 15   | 0.945      | criteria            |
| 8          | 14   | 0.993      | resilience          |

**Table S9 The top 10 highly-cited references.**

| Freq | Reference                 | Title                                                                        | Journal | Cluster ID |
|------|---------------------------|------------------------------------------------------------------------------|---------|------------|
| 35   | UN (2015)                 | Transf our world                                                             |         |            |
| 25   | Steffen W et al, (2015)   | Planetary boundaries: Guiding human development on a changing planet         | Science | 0          |
| 22   | Nilsson M et al, (2016)   | Map the interactions between Sustainable Development Goals                   | Nature  | 0          |
| 19   | Keesstra SD et al, (2016) | The significance of soils and soil science towards realization of the United | Soil    | 6          |

|    |                          |                                                                                        |                                                 |   |  |
|----|--------------------------|----------------------------------------------------------------------------------------|-------------------------------------------------|---|--|
|    |                          |                                                                                        | Nations<br>Sustainable<br>Development<br>Goals  |   |  |
| 14 | Wood SLR et al, (2018)   | Distilling the role of ecosystem services in the Sustainable Development Goals         | Ecosystem Services                              | 2 |  |
| 13 | Cowie AL et al, (2018)   | Land in balance: The scientific conceptual framework for Land Degradation Neutrality   | Environmental Science And Policy                | 3 |  |
| 11 | Le Blanc D et al, (2015) | Towards Integration at Last? The Sustainable Development Goals as a Network of Targets | Sustainable Development                         | 0 |  |
| 11 | Diaz S et al, (2015)     | The IPBES Conceptual Framework connecting nature and people                            | Current Opinion In Environmental Sustainability | 2 |  |
| 11 | Costanza R et al, (2015) | Changes in the global value of ecosystem services                                      | Global Environmental Change                     | 8 |  |

---

## References:

Asprilla, P. J., Diaz P, J. M., 2019. Importance of wild foods to household food security in tropical forest areas. Food Security, 11(1), 15-22.

- Atmiş, E., Daşdemir, I., Lise, W., Yıldırım, Ö., 2007. Factors affecting women's participation in forestry in Turkey. *Ecological Economics*, 60(4), 787-796.
- Brockerhoff, E. G., Jactel, H., Parrotta, J. A., Quine, C. P., Sayer, J., 2008. Plantation forests and biodiversity: oxymoron or opportunity? *Biodiversity and Conservation*, 17(5), 925-951.
- Brown, K. R., Aust, W. M., & McGuire, K. J., 2013. Sediment delivery from bare and graveled forest road stream crossing approaches in the Virginia Piedmont. *Forest Ecology and Management*, 310, 836-846.
- Chazdon, R. L. 2008. Beyond deforestation: Restoring forests and ecosystem services on degraded lands. *Science*, 320(5882), 1458-1460.
- Coleman, E. A., & Mwangi, E. 2013. Women's participation in forest management: A cross-country analysis. *Global Environmental Change-Human and Policy Dimensions*, 23(1), 193-205.
- Das, N. 2011. Women's dependence on forest and participation in forestry: A case study of joint forest management programme in West Bengal. *Journal of Forest Economics*, 17(1), 67-89.
- Deng, Y. Y., Koper, M., Haigh, M., Dornburg, V., 2015. Country-level assessment of long-term global bioenergy potential. *Biomass & Bioenergy*, 74, 253-267.
- Duffy, C., Toth, G. G., Hagan, R. P. O., McKeown, P. C., Rahman, S. A., Widyaningsih, Y., . . . Spillane, C. 2021. Agroforestry contributions to smallholder farmer food security in Indonesia. *Agroforestry Systems*, 95(6), 1109-1124.
- Favero, A., Sohngen, B., Huang, Y., Jin, Y. 2018. Global cost estimates of forest climate mitigation with albedo: a new integrative policy approach. *Environmental Research Letters*, 13(12).
- Fisher, M., Chaudhury, M. B., Mccusker, B., 2010. Do Forests Help Rural Households Adapt to Climate Variability? Evidence from Southern Malawi. *World Development*, 38(9):1241-1250.
- Gavin, M. C. 2009. Conservation implications of rainforest use patterns: mature forests provide more resources but secondary forests supply more medicine. *Journal of Applied Ecology*, 46(6), 1275-1282.
- Gonzales, P., & Ajami, N. 2017. Social and Structural Patterns of Drought-Related Water Conservation and Rebound. *Water Resources Research*, 53(12), 10619-10634.
- Grinand, C., Vieilledent, G., Razafimbelo, T., Rakotoarijaona, J. R., Nourtier, M., Bernoux, M., 2020. Landscape-scale spatial modelling of deforestation, land degradation, and regeneration using machine learning tools. *Land Degradation & Development*, 31(13), 1699-1712.
- Jacobson, M., Ciolkosz, D., 2020. Plantation forestry and pellet production in Kenya. *Biomass & Bioenergy*, 135.
- Jåstad, E. O., Bolkesjø, T. F., Trømborg, E., Rørstad, P. K. 2019. Large-scale forest-based biofuel production in the Nordic forest sector: Effects on the economics of forestry and forest industries. *Energy Conversion and Management*, 184, 374-388.
- Khatri, D., Shrestha, K., Ojha, H., Paudel, G., Paudel, N., & Pain, A. 2017. Reframing community forest governance for food security in Nepal. *Environmental Conservation*, 44(2), 174-182.
- Kindermann, G., Obersteiner, M., Sohngen, B., Sathaye, J., Andrasko, K., Rametsteiner, E., Schlamadinger, B., Wunder, S., Beach, R., 2008. Global cost estimates of reducing carbon emissions through avoided deforestation. *Proceedings of the National Academy of Sciences of the United States of America*, 105(30), 10302-10307.
- Klenner, W., Arsenault, A., Brockerhoff, E. G., Vyse, A., 2009. Biodiversity in forest ecosystems and landscapes: A conference to discuss future directions in biodiversity management for sustainable forestry. *Forest Ecology and Management*, 258, S1-S4.

- Konijnendijk, C. C., Ricard, R. M., Kenney, A., Randrup, T. B., 2006. Defining urban forestry – A comparative perspective of North America and Europe. *Urban Forestry & Urban Greening*, 2006, 4(3-4):93-103.
- Kouassi, J. L., Gyau, A., Diby, L., Bene, Y., Kouame, C., 2021. Assessing Land Use and Land Cover Change and Farmers' Perceptions of Deforestation and Land Degradation in South-West Cote d'Ivoire, West Africa. *Land*, 10(4).
- Liang, L., Lal, R., Ridoutt, B. G., Zhao, G., Du, Z., Li, L., . . . Wu, W. 2018. Multi-indicator assessment of a water-saving agricultural engineering project in North Beijing, China. *Agricultural Water Management*, 200, 34-46.
- Lippe, R. S., Cui, S., & Schweinle, J. 2021. Estimating Global Forest-Based Employment. *Forests*, 12(9).
- Millennium Ecosystem Assessment. 2005. *Ecosystems and Human Well-being: Synthesis*. Washington, DC.
- Nitoslawski, S. A., Galle, N.J., Konijnendijk, C. V. D. B., Steenberg, J. W. N., 2019. Smarter ecosystems for smarter cities? A review of trends, technologies, and turning points for smart urban forestry. *Sustainable Cities and Society*, 51.
- Nowak, D. J., Hirabayashi, S., Bodine, A., & Greenfield, E. 2014. Tree and forest effects on air quality and human health in the United States. *Environmental Pollution*, 193, 119-129.
- Panico, T., Caracciolo, F., Furno, M. 2022. Analysing the consumer purchasing behaviour for certified wood products in Italy. *Forest Policy and Economics*, 136.
- Parrotta, J. A., & Agnoletti, M. 2007. Traditional forest knowledge: Challenges and opportunities. *Forest Ecology and Management*, 249(1-2), 1-4.
- Piras, F., Venturi, M., Corrieri, F., Santoro, A., Agnoletti, M., 2021. Forest Surface Changes and Cultural Values: The Forests of Tuscany (Italy) in the Last Century. *Forests*, 12(5).
- Sears, R. R., Choden, K., Dorji, T., Dukpa, D., Phuntsho, S., Rai, P. B., Wangchuk, J., Baral, H., 2018. Bhutan's Forests through the Framework of Ecosystem Services: Rapid Assessment in Three Forest Types. *Forests*, 9(11).
- Tampakis, S., Andrea, V., Karanikola, P., Pailas, I., 2019. The Growth of Mountain Tourism in a Traditional Forest Area of Greece. *Forests*, 10(11).
- Wang, R., Zhang, J., Wu, T., Sun, S., Li, Z., Zhang, D, 2021. Forestry development to reduce poverty and improve the environment. *Journal of Forestry Research*:1-10.
- Wang, M. R.; Janssen, A. B. G.; Bazin, J.; Stokal, M.; Ma, L.; Kroeze, C. Accounting for interactions between Sustainable Development Goals is essential for water pollution control in China. *Nature Communications*. 2022,13(1):730.
- Wunder, S., Boerner, J., Shively, G., & Wyman, M. 2014. Safety Nets, Gap Filling and Forests: A Global-Comparative Perspective. *World Development*, 64, S29-S42.
- Yemiru, T., Roos, A., Campbell, B. M., & Bohlin, F. 2010. Forest incomes and poverty alleviation under participatory forest management in the Bale Highlands, Southern Ethiopia. *International Forestry Review*, 12(1), 66-77.
- Zhang, B., Li, W., Xie, G., & Xiao, Y. 2010. Water conservation of forest ecosystem in Beijing and its value. *Ecological Economics*, 69(7), 1416-1426.
